# Supplementary material for: Cigarette smoke promotes HIV infection of primary bronchial epithelium and additively suppresses CFTR function
Source: PubMed Central journal article supplement (PMC5964097; doi:10.1038/s41598-018-26095-z), 2018-05-22
Supplement: 41598_2018_26095_MOESM1_ESM.pdf [file 41598_2018_26095_MOESM1_ESM.pdf]

**Cigarette smoke promotes HIV infection of primary bronchial epithelium and additively suppresses CFTR function.**

Chinnapaiyan S<sup>1</sup>., Dutta R<sup>1</sup>., Bala J<sup>1</sup>., Parira T<sup>1</sup>., Agudelo M<sup>1</sup>., Nair M<sup>1</sup>., and Unwalla HJ<sup>1</sup> \*.

\* To whom correspondence should be addressed.

Hoshang Unwalla, PhD, Florida International University, Department of Immunology, Institute of Neuroimmune Pharmacology, 11200 SW 8th street NW 10th Ave., AHC-1 # 421, Miami, FL 33199. Tel.: 305-348-3442; Fax: 305-243-6992; email: hunwalla@fiu.edu

1. Department of Immunology, Institute of Neuroimmune Pharmacology, Herbert Wertheim College of Medicine, Florida International University. Miami, FL

a)

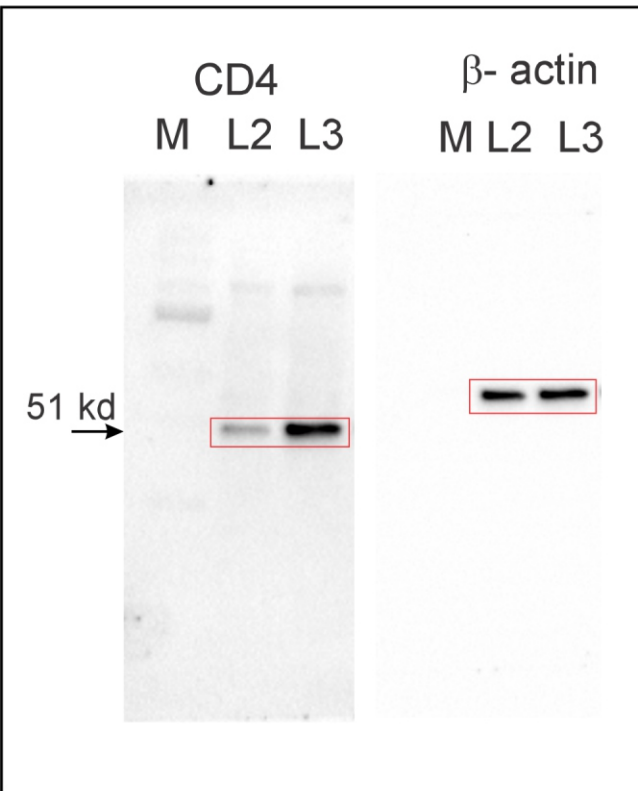

b)

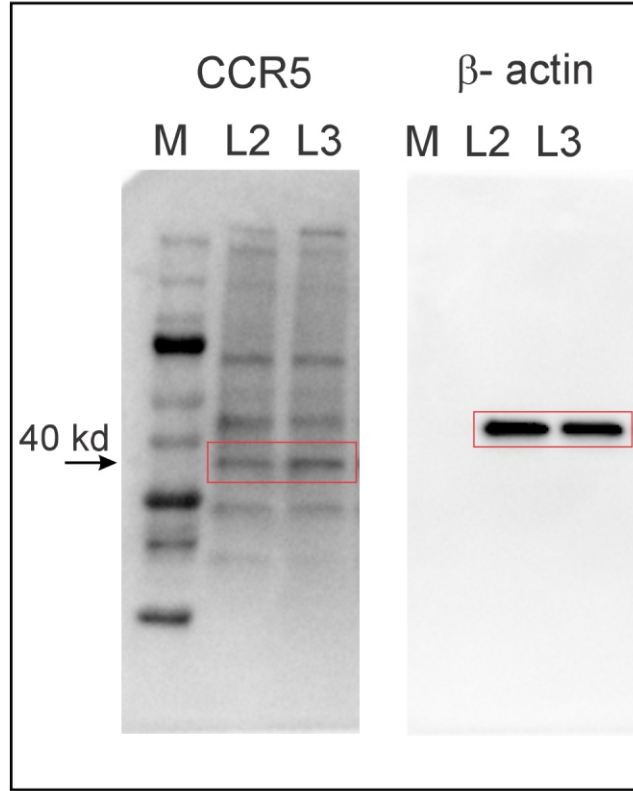

c)

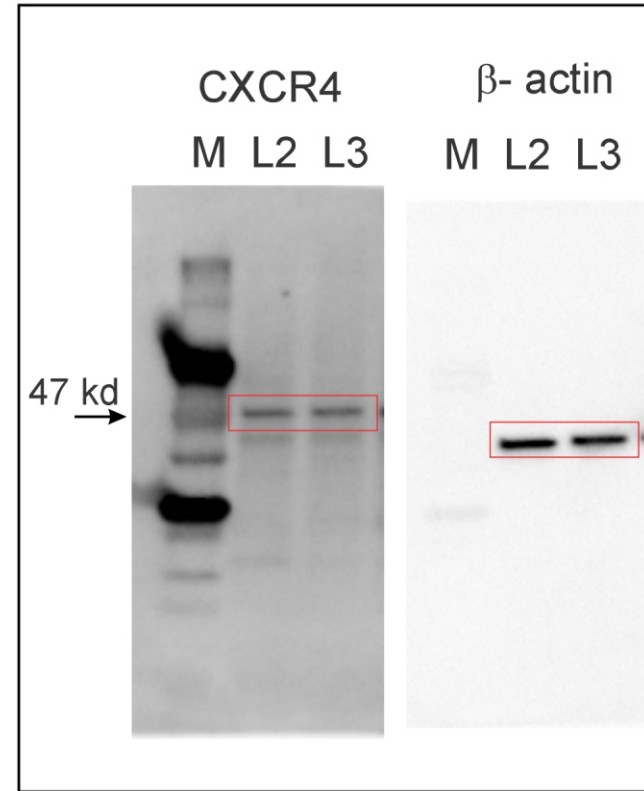

Full length western blot images. Panel a) CD4; Panel b) CCR5, Panel c) CXCR4.  
 M: Protein marker; Lane 2: Air; Lane 3: Smoke; Red color highlighted bands were used for our manuscript.

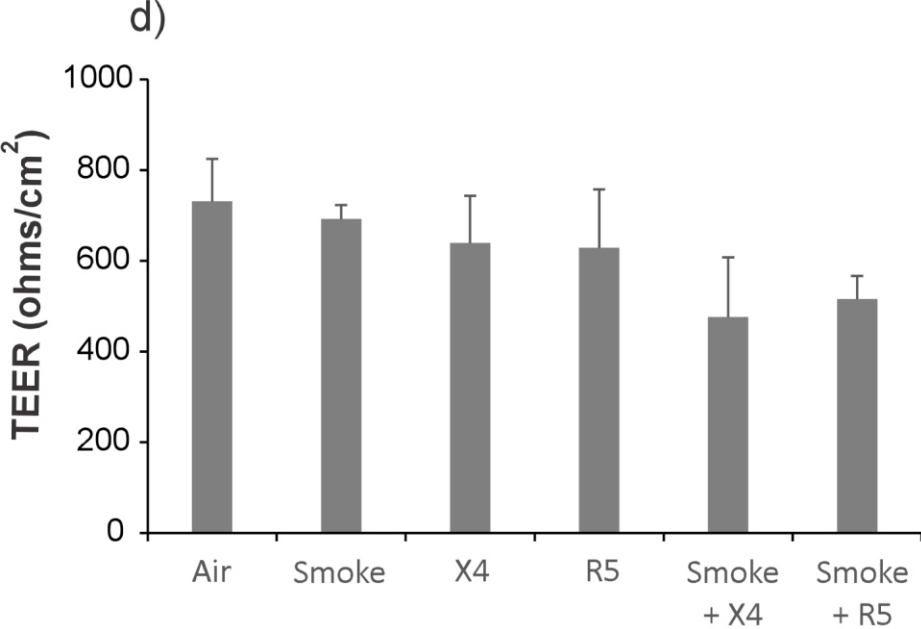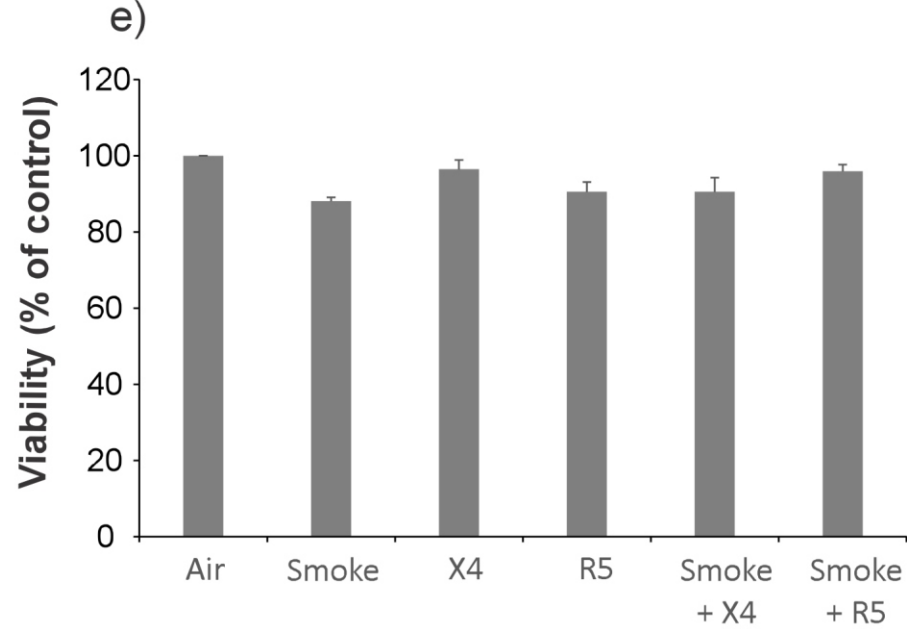

Panel d: Transepithelial electrical resistance (TEER) was measured following chronic exposure to HIV and/or CS. NHBE ALI cultures exposed to HIV and CS did show a trend towards a decreased TEER. Panel e: Cell viability assay demonstrates no significant change in viability in HIV or smoke exposed cells from Air exposed controls with the smoke and HIV p24 dose used.
